# Supplementary material
Source: Elsevier journal article supplement (https://www.sciencedirect.com/science/article/pii/S0121812317301068)
Supplement: mmc1 [file S0121812317301068:mmc1.docx]

**Table S1. Clinical and histologic relationship in patients with lupus nephritis**

| **Variable** | **Histological types** | | | |
| --- | --- | --- | --- | --- |
| **I**-**II:12**  **n (%)** | **III-IV:86**  **n (%)** | **V:18**  **n (%)** | **p** |
| SBP (mmHg) | 110 (100 - 120) * | 120(110 - 140) * | 120(110 - 133) * | 0.096± |
| DBP (mmHg) | 70(61 - 78) * | 80(70 - 83) * | 80(70 - 81) * | 0.122± |
| Nephritic syndrome | 5 (41.7) | 40(46.5) | 8(44.4) | 0.954+ |
| Nephrotic syndrome | 2 (16.7) | 35(40.7) | 7 (38.9) | 0.289+ |
| Acute renal failure | 0 (0) | 14(16.3) | 3 (16.7) | 0.339+ |
| Chronic renal failure | 1(8.3) | 9 (10.5) | 4(22.2) | 0.393+ |
| * Median (IQR)  + Exact Chi-square test  ±Kruskal Wallis test  SBP: Systolic blood pressure  DBP: Diastolic blood pressure | | | | |

**Table S2. Laboratory features of patients with lupus nephritis according to histological class**

| **Variable** | **Histological class** | | | |
| --- | --- | --- | --- | --- |
| **I**-**II:12**  **n (%)** | **III-IV:86**  **n (%)** | **V:18**  **n (%)** | **p** |
| Hematuria | 6 (50.0) | 62 (72.1) | 8 (44.4) | 0.040+ |
| Leukocyturia | 4 (33.3) | 40 (46.5) | 4 (22.2) | 0.129+ |
| Proteinuria | 6 (50.0) | 69 (80.2) | 15 (83.3) | 0.062+ |
| Cylindruria | 0 (0) | 18 (20.9) | 5 (27.8) | 0.164+ |
| Active urinary sediment | 0 (0) | 16 (18.6) | 2 (11.1) | 0.219+ |
| 24-hour proteinuria (mg)* | 664  (313 - 699) | 2560  (1349 - 5028) | 1830  (493-3978) | <0.0001± |
| Serum creatinine (mg/dL)* | 0.72  (0.61 - 0.94) | 1.0  (0.73 - 1.39) | 0.80  (0.60 - 1.28) | 0.013± |
| Positive anti-DNA antibodies | 7(58.3) | 67(77.9) | 11(61.1) | 0.191+ |
| C3 hypocomplementemia | 7(58.3) | 61(70.9) | 6(33.3) | 0.008+ |
| C4 hypocomplementemia | 5 (41.7) | 32(37.2) | 1 (5.6) | 0.028+ |
| * Median (IQR)  + Exact Chi-square test  ±Kruskal Wallis test | | | | |

**Table S3. Activity and chronicity índices according to histological class (n=116)**

| **Variable** | **Histological classes** | | | |
| --- | --- | --- | --- | --- |
| **I**-**II:12**  **n (%)** | **III-IV:86**  **n (%)** | **V:18**  **n (%)** | **p** |
| Activity index * | 1 (0-3.5) | 7.5 (4 – 11.3) | 0 (0-1) | <0.0001± |
| Chronicity index * | 0 (0 – 1.75) | 1(0 – 3.0) | 0 (0 – 1.3) | 0.052± |
| * Median (IQR)  ±Kruskal Wallis test | | | | |
